# Supplementary material for: Probing the difference in covalence by enthalpy measurements: a new heterocyclic N-donor ligand for actinide/lanthanide separation
Source: Royal Society of Chemistry journal article supplement (doi:10.1039/c5dt00679a), 2015-01-01

## Supporting Information

### Contents

1. Spectrophotometric titration of Eu/BQPhen (Figure S1)
2. Calorimetric titration of Nd/BQPhen (Figure S2)
3. Solvent extraction of  $^{241}\text{Am}$  and  $^{152}\text{Eu}$  (Table S1)
4. Isomers of BQPhen (Figure S3)
5. Calculated Free Energy of species (Table S2)
6. NMR data: Ligand characterization (Figure S4, Figure S5)

### 1. Spectrophotometric titration of Eu/BQPhen

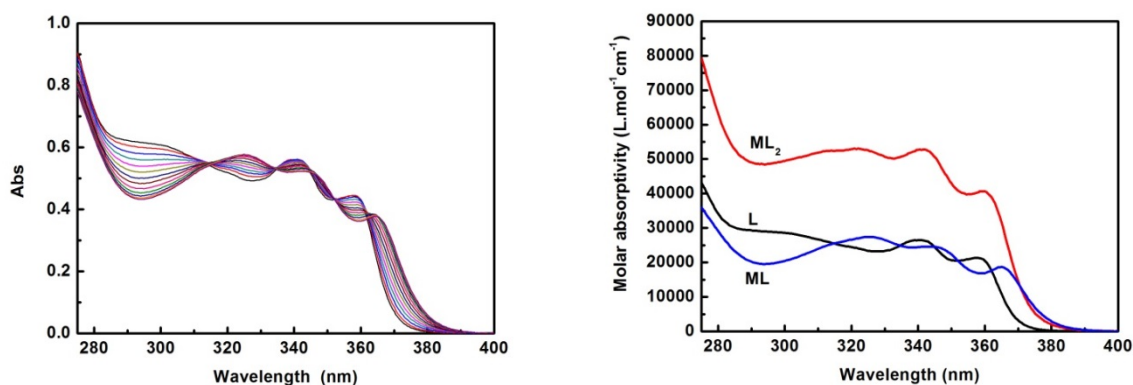

**Figure S1.** Representative spectrophotometric titrations of ligand BQPhen with europium(III) perchlorate in DMF ( $I=0.1$  mol/L TMA) at 25°C. Left: absorption spectra of the titration. Initial solution in the cuvette: 2.0 mL,  $c^0(\text{BQPhen})=2.11 \times 10^{-5}$  mol/L; Titrant:  $2.13 \times 10^{-4}$  mol/L  $\text{Eu}(\text{ClO}_4)_3$ . Right: Calculated molar absorptivity of free L (black), ML (green) and  $\text{ML}_2$  (red)

### 2. Calorimetric titration of Nd/BQPhen

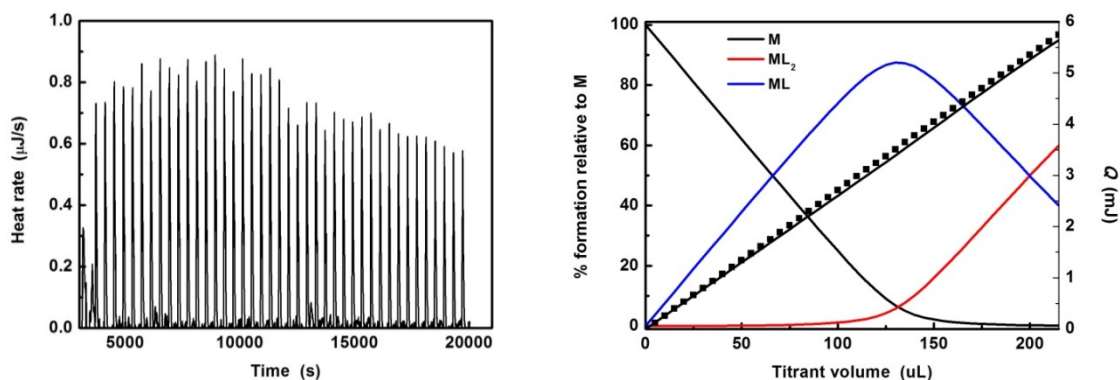

**Figure S2.** Representative microcalorimetric titration of Nd(III)/BQPhen complexation ( $t=25.0$  °C,  $I=0.1$  M TMA in DMF). Titrant: 0.0048 mol/L ligand BQPhen, about 42 additions of 0.005 mL each. Initial solution in ampoule:  $V_0=0.9$  mL,  $c_0(\text{Nd})=7.0 \times 10^{-4}$  mol/L. Left: thermogram, right: total heat (right y axis, closed symbol, experimental; line, calculated) and speciation of Nd(III) (left y axis, lines, black,  $\text{Nd}^{3+}$ , blue,  $\text{NdBQPhen}^+$ ; red,  $\text{NdL}_2^{3+}$ ) versus the volume of the titrant.

### 3 Solvent extraction of $^{241}\text{Am}$ and $^{152}\text{Eu}$

**Table S1.** The distribution of  $^{241}\text{Am}$  and  $^{152}\text{Eu}$  between the organic phase and the aqueous phase as a function of the extractant (BQPhen) concentration. The organic phase: nitrobenzene as diluent, and 0.2 M 2-bromohexanoic acid as phase modifier; aqueous phase: 0.01 M nitric acid with trace metallic ions.

| [L]      | $D_{\text{Am}}$ | $D_{\text{Eu}}$ | $SF_{\text{Am/Eu}}$ |
|----------|-----------------|-----------------|---------------------|
| 4.84E-05 | 2.1             | 0.3             | 7.8                 |
| 7.26E-05 | 4.3             | 0.4             | 10.9                |
| 9.68E-05 | 6.7             | 0.7             | 9.3                 |
| 1.33E-04 | 18.2            | 1.8             | 10.1                |
| 1.99E-04 | 21.9            | 1.8             | 12.0                |
| 2.42E-04 | 47.2            | 4.1             | 11.6                |
| 6.05E-04 | 211.0           | 26.2            | 8.1                 |

In the extraction system, the organic phase contains BQPhen (L) and 2-bromohexanoic acid (HA) as the synergistic extractants. HA is also responsible for the transport of the metal ions from the aqueous phase to the organic phase. Because HA exists in the dimeric form,<sup>[1,2]</sup> the extraction equilibrium is expressed as reaction S1,

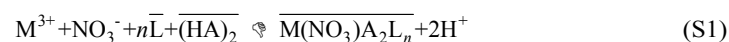

where the bar above a species denotes the species is in the organic phase. The extraction equilibrium constant  $K_{\text{ex}}$  can be described as

$$K_{\text{ex}} = \frac{[\text{H}^+]^2 [\overline{\text{M}(\text{NO}_3)_2\text{L}_n}]}{[\text{M}^{3+}] [\text{NO}_3^-] [\overline{(\text{HA})_2}] [\overline{\text{L}}]^n} = D \frac{[\text{H}^+]^2}{[\text{NO}_3^-] [\overline{(\text{HA})_2}] [\overline{\text{L}}]^n} \quad (\text{S2})$$

Then,

$$\log D = n \log [\overline{\text{L}}] + \log K_{\text{ex}} - \log \left( \frac{[\text{H}^+]^2}{[\text{NO}_3^-] [\overline{(\text{HA})_2}]} \right) \quad (\text{S3})$$

The plot of  $\log D$  vs.  $\log [\overline{\text{L}}]$  is linear, with the slope =  $n$  and the intercept =  $\log K_{\text{ex}} - \log ([\text{H}^+]^2 / ([\text{NO}_3^-] [\overline{(\text{HA})_2}]))$ . In the experiments, the aqueous concentrations of  $\text{H}^+$  and  $\text{NO}_3^-$  and the organic phase concentration of HA ( $[\overline{(\text{HA})_2}]$ ) are constant and identical for the extraction of Am(III) and Eu(III) (both in tracer quantities). Therefore, the difference in the intercepts between Am(III) and Eu(III) is equal to the difference in  $K_{\text{ex}}$ :

$$(\text{Intercept})_{\text{Am}} - (\text{Intercept})_{\text{Eu}} = \log K_{\text{ex}}(\text{Am}) - \log K_{\text{ex}}(\text{Eu})$$

#### References for extraction

1. T. Sekine, M. Isayama, S. Yamaguchi, H. Moriya, *Bull. Chem. Soc. Jap.*, 1967, **40**, 27.
2. S. Andersson, C. Ekberg, M. R. S. Foreman, M. J. Hudson, J.-O. Liljenzin, M. Nilsson, G. Skarnemark, K. Spahiu, *Solv. Extra. Ion Exch.*, 2003, 21, 621.

## 4 Isomers of BQPhen

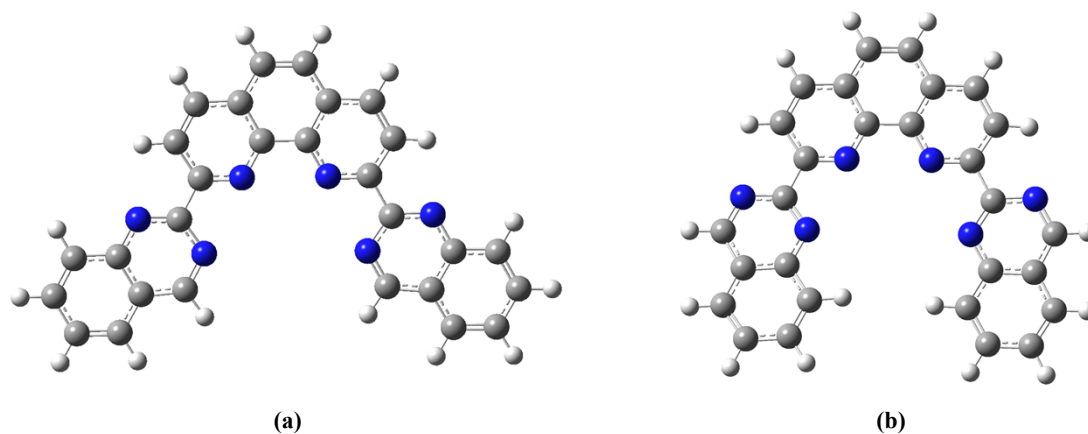

**Figure S3.** 3D structures of BQPhen isomers calculated by B3LYP method in the gas phase. Blue, grey and white colors denote N, C, and H atoms respectively.

## 5 Calculated free energy of species

**Table S2.** Calculated  $\Delta G_g$ ,  $\Delta\Delta G_{\text{solv}}$  and  $\Delta G_{\text{solv}}$  of the relative species of  $[\text{ML}_2(\text{NO}_3)]^{2+}$  formation reactions

| Species                                               | $\Delta G_g$ | $\Delta\Delta G_{\text{solv}}$ | $\Delta G_{\text{solv}}$ |
|-------------------------------------------------------|--------------|--------------------------------|--------------------------|
|                                                       | Hartree      | kcal/mol                       | Hartree                  |
| BQPhen                                                | -1405.163    | 6.13                           | -1405.153                |
| $[\text{Am}(\text{BQPhen})_2(\text{NO}_3)]^{2+}$      | -3685.886    | -53.58                         | -3685.971                |
| $[\text{Eu}(\text{BQPhen})_2(\text{NO}_3)]^{2+}$      | -3800.778    | -51.34                         | -3800.860                |
| BTPhen                                                | -1756.936    | 16.07                          | -1756.910                |
| $[\text{Am}(\text{NO}_3)(\text{H}_2\text{O})_7]^{2+}$ | -1410.504    | -150.45                        | -1410.744                |
| $[\text{Eu}(\text{NO}_3)(\text{H}_2\text{O})_7]^{2+}$ | -1525.392    | -151.11                        | -1525.633                |
| $[\text{Am}(\text{BTPhen})_2(\text{NO}_3)]^{2+}$      | -4389.474    | -10.06                         | -4389.490                |
| $[\text{Eu}(\text{BTPhen})_2(\text{NO}_3)]^{2+}$      | -4504.368    | -5.90                          | -4504.377                |
| $\text{H}_2\text{O}$                                  | -76.444      | -1.94                          | -76.447                  |
| $\text{NO}_3^-$                                       | -280.436     | -59.12                         | -280.530                 |

## 6. NMR data: Ligand characterization

$^1\text{H}$  NMR spectrum was measured on a Bruker AM400 NMR spectrometer. HRMS spectral data were recorded on a Bruker Daltonics Bio TOF mass spectrometer.

Figure S4.  $^1\text{H}$  NMR spectrum of BQPhen in DMSO

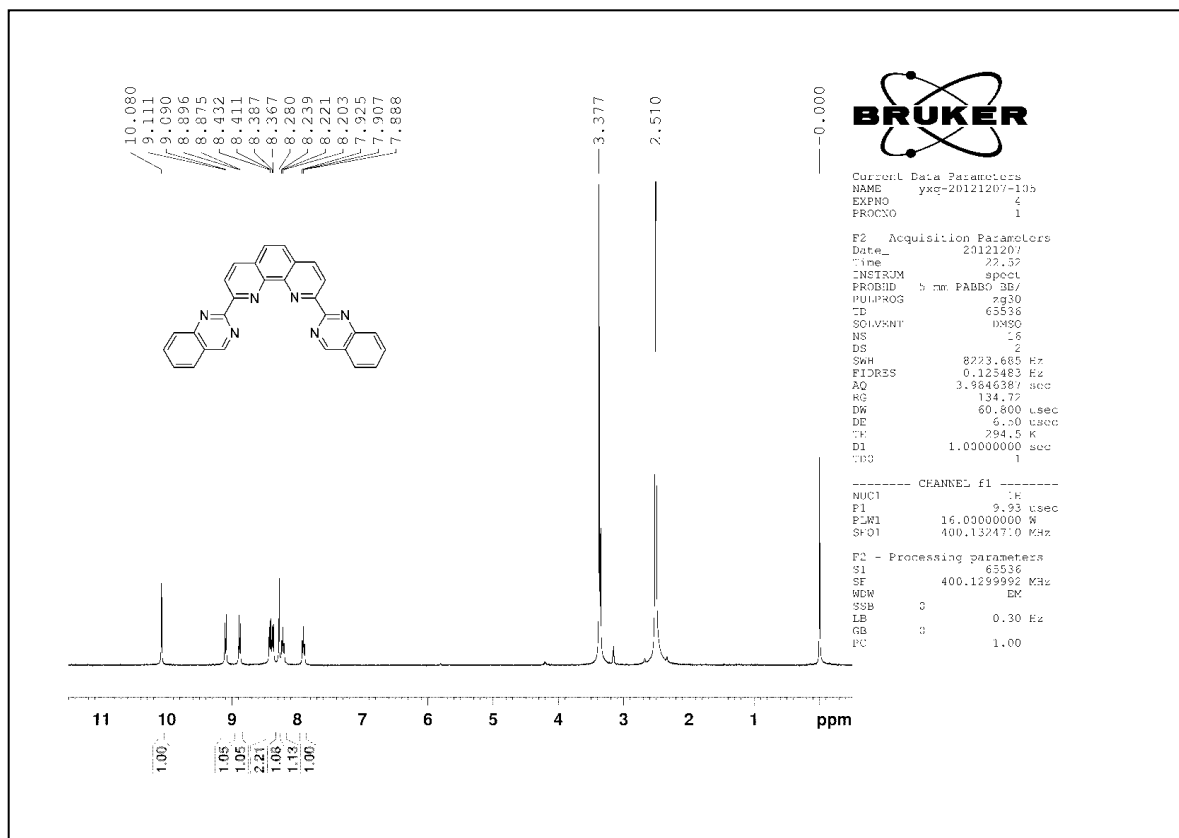

Figure S5. HRMS spectrum of BQPhen

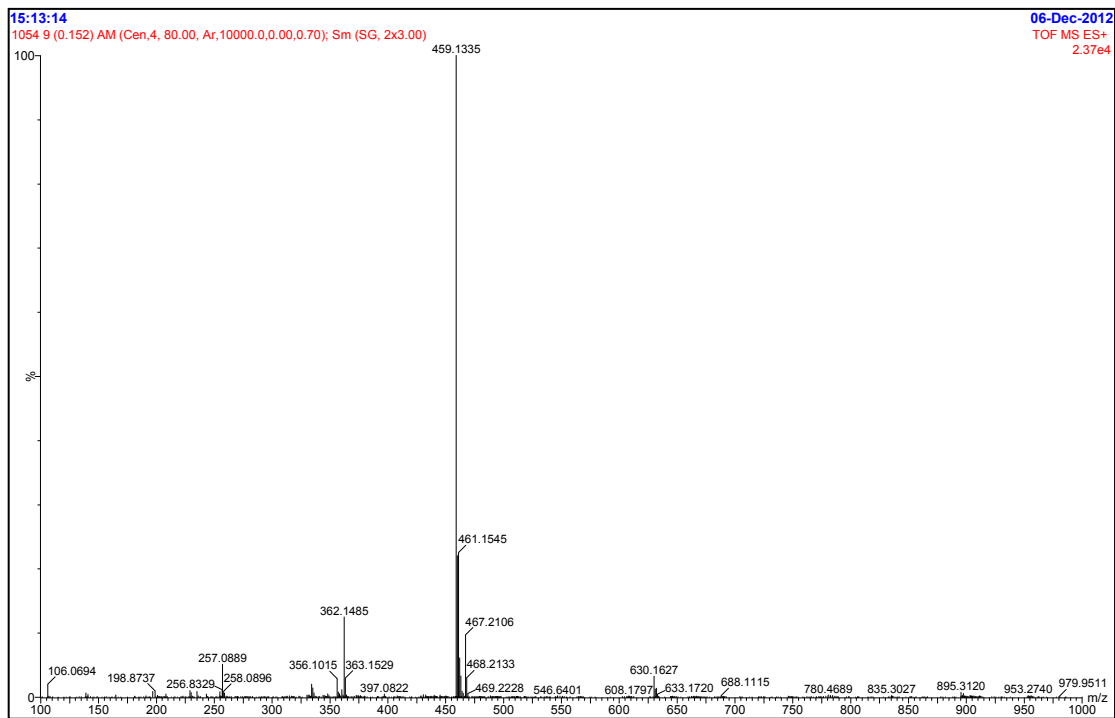

Supplement: c5dt00679a1.pdf [file c5dt00679a1.pdf]
